# Supplementary material
Source: publisher figshare collection journal article supplement (https://tandf.figshare.com/articles/dataset/_/5427139)
Supplement: Supplementary file 1 [file 4]

## Appendix 2. Fatalities by year and incident type

|                              | All<br>(N) | All<br>(%) | '90 | '91 | '92 | '93 | '94 | '95 | '96 | '97 | '98 | '99 | '00 | '01 | '02 | '03 | '04 | '05 | '06 | '07 | '08 | '09 | '10 | '11 | '12 | '13 | '14 |
|------------------------------|------------|------------|-----|-----|-----|-----|-----|-----|-----|-----|-----|-----|-----|-----|-----|-----|-----|-----|-----|-----|-----|-----|-----|-----|-----|-----|-----|
| Back-overs                   | 1232       | 36%        | -   | 3   | 4   | 5   | 12  | 10  | 7   | 11  | 17  | 24  | 28  | 53  | 70  | 106 | 84  | 108 | 82  | 102 | 76  | 86  | 65  | 78  | 70  | 60  | 71  |
| Carbon Monoxide              | 29         | 1%         | -   | -   | -   | -   | -   | -   | -   | 3   | -   | 1   | 1   | 2   | 1   | 5   | -   | 7   | 3   | -   | -   | 5   | -   | -   | -   | 1   | -   |
| Drowning                     | 36         | 1%         | -   | -   | -   | -   | -   | -   | -   | 2   | -   | -   | -   | -   | -   | -   | 1   | 1   | -   | 2   | 3   | 10  | 4   | 5   | 3   | 2   | 3   |
| Falls                        | 54         | 2%         | -   | -   | -   | -   | -   | -   | 1   | -   | 1   | 1   | 1   | 2   | 2   | 2   | 1   | 3   | 4   | -   | 2   | 11  | 6   | 5   | 4   | 7   | 1   |
| Fire                         | 41         | 1%         | -   | -   | -   | 1   | -   | -   | 3   | -   | 3   | 2   | 3   | 3   | 3   | 4   | -   | 3   | 2   | 6   | -   | 2   | 1   | 3   | 2   | -   | -   |
| Front-overs                  | 692        | 20%        | -   | -   | 1   | -   | -   | 3   | -   | 4   | 5   | 9   | 7   | 7   | 8   | 10  | 27  | 46  | 67  | 56  | 66  | 71  | 76  | 56  | 49  | 60  | 64  |
| Hypothermia                  | 4          | 0.1%       | -   | -   | -   | -   | -   | -   | -   | -   | -   | -   | 1   | 1   | -   | -   | -   | -   | 1   | -   | -   | 1   | -   | -   | -   | -   | -   |
| Hyperthermia                 | 729        | 21%        | 5   | 5   | 4   | 11  | 9   | 24  | 11  | 21  | 39  | 32  | 35  | 39  | 31  | 43  | 39  | 47  | 29  | 36  | 43  | 33  | 49  | 33  | 35  | 44  | 32  |
| Power Window                 | 61         | 2%         | -   | -   | 3   | 1   | 1   | 1   | 1   | 5   | 5   | 2   | 2   | 3   | 4   | 5   | 9   | 3   | 3   | 1   | 3   | 2   | 1   | 1   | 2   | 1   | 2   |
| Roll-over un-known direction | 22         | 2%         | -   | -   | -   | -   | -   | -   | -   | -   | -   | -   | -   | 1   | -   | 2   | 2   | 2   | 3   | 1   | 2   | 5   | -   | -   | -   | 2   | 2   |
| Seat Belt Strangulation      | 10         | 0%         | -   | -   | -   | -   | -   | 1   | -   | 1   | 1   | -   | -   | 3   | 1   | 1   | -   | 2   | -   | -   | -   | -   | -   | -   | -   | -   | -   |
| Underage Driver              | 203        | 6%         | -   | -   | 1   | -   | 1   | 1   | -   | 2   | 1   | 4   | 6   | 7   | -   | 2   | 8   | 5   | 17  | 14  | 13  | 34  | 22  | 14  | 24  | 10  | 17  |
| Vehicle in Motion            | 227        | 7%         | -   | 1   | -   | 1   | 2   | -   | 9   | 1   | 9   | 9   | 12  | 10  | 14  | 18  | 19  | 17  | 13  | 22  | 7   | 11  | 10  | 11  | 12  | 14  | 5   |
| Other                        | 56         | 2%         | -   | -   | 1   | 1   | -   | -   | -   | -   | 2   | -   | 3   | 1   | -   | 3   | 5   | 4   | 6   | 7   | 5   | 6   | 3   | 3   | 5   | -   | 1   |
| Total                        | 3396       | --         | 5   | 9   | 14  | 20  | 25  | 40  | 32  | 50  | 83  | 84  | 99  | 132 | 134 | 201 | 195 | 248 | 230 | 247 | 220 | 277 | 237 | 209 | 206 | 201 | 198 |
