# Supplementary material
Source: publisher figshare collection journal article supplement (https://tandf.figshare.com/articles/dataset/_/5427139)
Supplement: Supplementary file 2 [file 4]

Appendix 1: Age and sex of the victim, incident location, and vehicle type for the January 1990- December 2014 sample by mechanism of incident

|                                    | ALL incidents | ALL victims | Back-over | Front-over | Cold Car | Hot Car | Left Alone | Car Theft | Power Windows | Car Trunk Entrapment | Underage Drivers | Set into Motion | Carbon Monoxide | Drowning | Falls | Fire | Seat Belt | Kidnapping | Got out of vehicle | Other |
|------------------------------------|---------------|-------------|-----------|------------|----------|---------|------------|-----------|---------------|----------------------|------------------|-----------------|-----------------|----------|-------|------|-----------|------------|--------------------|-------|
| <b>Total</b>                       | 11759         | 14568       | 2346      | 1640       | 968      | 4099    | 1847       | 976       | 205           | 95                   | 663              | 1035            | 72              | 68       | 145   | 135  | 21        | 32         | 89                 | 132   |
| <b>Percentage of total victims</b> | -             | -           | 16.1%     | 11.3%      | 6.6%     | 28.1%   | 12.7%      | 6.7%      | 1.4%          | 0.7%                 | 4.6%             | 7.1%            | 0.5%            | 0.5%     | 1.0%  | 0.9% | 0.1%      | 0.2%       | 0.6%               | 0.9%  |
| <b>Age in Years (mean)</b>         | -             | 3.7         | 3.0       | 5.1        | 3.5      | 2.8     | 3.6        | 3.2       | 3.6           | 7.3                  | 10.3             | 3.9             | 5.7             | 4.3      | 5.3   | 3.7  | 2.6       | 4.8        | 4.2                | 4.4   |
| <b>Sex (% Male)</b>                | -             | 43.2        | 57.3      | 53.9       | 35.7     | 36.2    | 30.4       | 47.3      | 39            | 43.2                 | 46.6             | 41.7            | 34.7            | 51.5     | 64.1  | 43.7 | 57.1      | 34.4       | 56.2               | 46.2  |
| <b>Site/Location (n)</b>           |               |             |           |            |          |         |            |           |               |                      |                  |                 |                 |          |       |      |           |            |                    |       |
| Driveway of Victim                 | 1992          | 2182        | 920       | 266        | 17       | 355     | 71         | 90        | 23            | 16                   | 51               | 293             | 7               | 1        | 27    | 21   | 3         | 2          | 4                  | 15    |
| Shopping Centers                   | 1299          | 1795        | 39        | 64         | 238      | 935     | 367        | 63        | 1             | 5                    | 10               | 34              | 2               | -        | 3     | 18   | 1         | 2          | 6                  | 7     |
| Street                             | 1279          | 1717        | 148       | 258        | 77       | 201     | 188        | 107       | 6             | 29                   | 455              | 99              | 14              | 16       | 48    | 18   | 4         | 8          | 13                 | 28    |
| Parking Lot                        | 1232          | 1538        | 120       | 115        | 140      | 623     | 271        | 87        | 21            | 7                    | 30               | 67              | 1               | -        | 7     | 18   | 1         | 5          | 17                 | 8     |
| Driveway                           | 1002          | 1128        | 514       | 114        | 15       | 94      | 37         | 80        | 23            | 2                    | 20               | 181             | 1               | -        | 12    | 18   | -         | 1          | 4                  | 12    |
| Store                              | 567           | 827         | 12        | 44         | 126      | 478     | 123        | 16        | 1             | 3                    | 2                | 6               | -               | -        | 2     | 3    | 1         | 3          | 1                  | 6     |
| Apartment Complex                  | 440           | 499         | 133       | 109        | 17       | 93      | 28         | 48        | 2             | 1                    | 6                | 32              | 3               | 2        | 11    | 6    | -         | -          | 2                  | 6     |
| Grocery Store/Market               | 364           | 504         | 14        | 19         | 48       | 271     | 75         | 42        | 2             | 4                    | 3                | 12              | -               | 2        | 1     | -    | 2         | 5          | -                  | 4     |
| Convenience Store/ Gas Station     | 352           | 419         | 10        | 23         | 28       | 25      | 39         | 237       | 1             | -                    | 4                | 31              | -               | -        | 1     | 3    | -         | 3          | 1                  | 13    |
| School                             | 316           | 380         | 33        | 149        | 24       | 76      | 41         | 8         | 3             | 1                    | 11               | 14              | -               | -        | 4     | 3    | 1         | -          | 6                  | 6     |
| Day Care Center                    | 211           | 236         | 22        | 16         | 13       | 97      | 45         | 27        | 1             | -                    | 1                | 11              | -               | -        | -     | -    | -         | -          | 1                  | 2     |
| Restaurant                         | 203           | 260         | 14        | 29         | 7        | 88      | 46         | 45        | 4             | 2                    | 6                | 10              | -               | 2        | 2     | -    | -         | 1          | 2                  | 2     |
| Bar, Pub, Strip Club, Night Club   | 184           | 241         | 1         | 1          | 49       | 91      | 84         | 3         | -             | 1                    | -                | -               | -               | 1        | -     | -    | -         | 1          | 9                  | -     |
| Casino                             | 162           | 249         | 1         | 1          | 37       | 131     | 71         | 1         | -             | -                    | -                | 2               | -               | -        | -     | 2    | -         | -          | 3                  | -     |
| Sidewalk                           | 136           | 210         | 39        | 158        | -        | -       | 3          | -         | -             | -                    | 3                | 6               | -               | -        | -     | -    | -         | -          | -                  | 1     |
| Bus yard, lot, barn                | 132           | 136         | 1         | 3          | 29       | 53      | 43         | -         | -             | -                    | -                | -               | -               | -        | -     | -    | -         | -          | 7                  | -     |
| Trailer Park/Mobile Home           | 114           | 126         | 48        | 38         | 1        | 24      | 2          | 1         | 1             | -                    | -                | 7               | -               | -        | 3     | -    | 1         | -          | -                  | -     |

|                              |      |      |     |     |     |      |     |     |    |    |     |     |    |    |    |    |    |    |    |    |
|------------------------------|------|------|-----|-----|-----|------|-----|-----|----|----|-----|-----|----|----|----|----|----|----|----|----|
| Park/Camp Ground             | 96   | 115  | 35  | 28  | -   | 23   | 3   | 6   | 1  | -  | -   | 12  | -  | 1  | 2  | -  | -  | -  | 1  | 3  |
| Hospital/Medical Facility    | 95   | 116  | 4   | 7   | 7   | 59   | 24  | 11  | 2  | -  | -   | 1   | -  | -  | -  | -  | -  | -  | -  | 1  |
| Yard                         | 92   | 118  | 30  | 49  | -   | 7    | 3   | -   | 1  | -  | 7   | 11  | -  | 2  | -  | 2  | -  | -  | -  | 6  |
| Church Parking Lot           | 88   | 94   | 19  | 15  | 4   | 27   | 7   | 7   | 2  | 1  | 3   | 7   | -  | -  | 2  | -  | -  | -  | -  | -  |
| Hotel/Motel Parking Lot      | 51   | 67   | 12  | 3   | 12  | 13   | 12  | 10  | -  | 2  | 1   | 2   | -  | -  | -  | -  | -  | -  | -  | -  |
| Garage of Home               | 50   | 66   | 9   | -   | -   | 4    | 4   | 1   | 3  | 1  | 5   | 7   | 30 | -  | -  | 1  | 1  | -  | -  | -  |
| Alley                        | 45   | 50   | 15  | 15  | 3   | 6    | 3   | 3   | -  | -  | -   | 3   | -  | -  | -  | -  | -  | -  | 1  | 1  |
| Court House                  | 35   | 49   | 2   | -   | 2   | 32   | 13  | -   | -  | -  | -   | -   | -  | -  | -  | -  | -  | -  | -  | -  |
| Post Office                  | 28   | 35   | 1   | 1   | -   | 13   | 10  | 5   | 2  | 1  | -   | -   | -  | -  | -  | 1  | -  | -  | 1  | -  |
| Parking Garage               | 27   | 32   | -   | 1   | 5   | 15   | 8   | -   | -  | -  | -   | -   | -  | -  | -  | 1  | -  | -  | -  | 2  |
| Laundry Mat/<br>Dry Cleaners | 24   | 27   | 4   | 1   | -   | 8    | 2   | 12  | -  | -  | -   | -   | -  | -  | -  | -  | -  | -  | -  | -  |
| Car Wash                     | 23   | 29   | 10  | 9   | -   | 2    | 1   | 3   | -  | -  | -   | 3   | -  | -  | 1  | -  | -  | -  | -  | -  |
| Bank                         | 19   | 23   | 1   | -   | -   | 10   | 4   | 7   | -  | -  | -   | -   | -  | 1  | -  | -  | -  | -  | -  | -  |
| Library                      | 15   | 16   | 2   | 2   | -   | 8    | 2   | -   | -  | -  | 2   | -   | -  | -  | -  | -  | -  | -  | -  | -  |
| Jail/Prison Parking Lot      | 14   | 24   | -   | -   | -   | 13   | 5   | 1   | -  | -  | -   | -   | 3  | -  | -  | -  | -  | -  | 2  | -  |
| Garage                       | 12   | 12   | -   | 4   | 2   | 4    | 1   | -   | 1  | -  | -   | -   | -  | -  | -  | -  | -  | -  | -  | -  |
| Liquor Store                 | 12   | 14   | -   | -   | -   | 7    | 1   | 5   | -  | -  | 1   | -   | -  | -  | -  | -  | -  | -  | -  | -  |
| Tanning Salon                | 10   | 16   | -   | -   | 3   | 10   | 3   | -   | -  | -  | -   | -   | -  | -  | -  | -  | -  | -  | -  | -  |
| Movie Theater                | 9    | 10   | -   | -   | 3   | 4    | 2   | -   | -  | -  | -   | 1   | -  | -  | -  | -  | -  | -  | -  | -  |
| Gym Parking Lot              | 8    | 9    | -   | -   | -   | 4    | 5   | -   | -  | -  | -   | -   | -  | -  | -  | -  | -  | -  | -  | -  |
| On Beach                     | 7    | 7    | -   | 7   | -   | -    | -   | -   | -  | -  | -   | -   | -  | -  | -  | -  | -  | -  | -  | -  |
| Other                        | 238  | 311  | 34  | 61  | 10  | 25   | 31  | 5   | 8  | 8  | 30  | 27  | 3  | 40 | 12 | 8  | -  | -  | 4  | 5  |
| Unknown                      | 776  | 881  | 99  | 30  | 51  | 170  | 169 | 45  | 96 | 11 | 12  | 156 | 8  | -  | 7  | 12 | 6  | 1  | 4  | 4  |
| <b>Type of Vehicle (n)</b>   |      |      |     |     |     |      |     |     |    |    |     |     |    |    |    |    |    |    |    |    |
| 2-4 Door Car/Sedan           | 5267 | 6771 | 717 | 541 | 542 | 2326 | 910 | 525 | 99 | 88 | 363 | 384 | 37 | 37 | 35 | 41 | 10 | 13 | 42 | 61 |

|                                                          |      |      |     |     |     |     |     |     |    |   |     |     |    |    |    |    |   |   |    |    |
|----------------------------------------------------------|------|------|-----|-----|-----|-----|-----|-----|----|---|-----|-----|----|----|----|----|---|---|----|----|
| Sports Utility Vehicle                                   | 1554 | 1905 | 427 | 352 | 44  | 394 | 103 | 193 | 40 | - | 116 | 131 | 16 | 19 | 18 | 24 | 1 | 7 | 6  | 14 |
| Pickup Truck                                             | 1376 | 1589 | 571 | 317 | 25  | 167 | 80  | 78  | 27 | - | 65  | 165 | 8  | 7  | 43 | 8  | 2 | 4 | 9  | 13 |
| Minivans                                                 | 1146 | 1497 | 201 | 112 | 65  | 466 | 158 | 109 | 22 | - | 51  | 217 | 7  | 5  | 13 | 43 | 4 | 5 | 8  | 11 |
| Bus                                                      | 507  | 549  | 5   | 90  | 121 | 147 | 145 | -   | -  | - | 3   | 20  | -  | -  | 4  | -  | - | - | 11 | 3  |
| Child Care Van                                           | 195  | 207  | 3   | 8   | 20  | 88  | 74  | 9   | -  | - | 2   | -   | -  | -  | -  | -  | - | - | 1  | 2  |
| Delivery, Construction, Garbage Trucks                   | 98   | 117  | 52  | 30  | -   | 6   | 5   | -   | -  | - | 8   | 4   | -  | -  | 3  | -  | - | - | -  | 9  |
| Station Wagon                                            | 60   | 68   | 11  | 4   | 4   | 17  | 4   | 2   | 5  | - | 10  | 7   | -  | -  | 1  | 2  | 1 | - | -  | -  |
| Motor Homes, 18 Wheelers, Semi, or other heavy equipment | 20   | 31   | 6   | 8   | 2   | 2   | -   | -   | -  | - | -   | 10  | -  | -  | 2  | 1  | - | - | -  | -  |
| Delivery, Conversion, Commercial                         | 16   | 20   | 7   | 2   | -   | 5   | 4   | 1   | -  | - | -   | 1   | -  | -  | -  | -  | - | - | -  | -  |
| Other                                                    | 83   | 102  | 22  | 17  | 3   | 12  | 8   | 4   | -  | - | 7   | 3   | -  | -  | 14 | 6  | - | - | -  | 6  |
| Unknown                                                  | 1437 | 1712 | 324 | 159 | 142 | 469 | 356 | 55  | 12 | 7 | 38  | 93  | 4  | -  | 12 | 10 | 3 | 3 | 12 | 13 |
